# Supplementary material for: scGET: Predicting Cell Fate Transition During Early Embryonic Development by Single-cell Graph Entropy
Source: PubMed Central journal article supplement (PMC8864248; doi:10.1016/j.gpb.2020.11.008), 2021-12-24

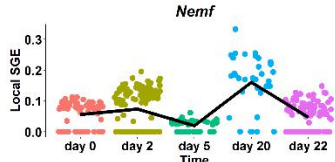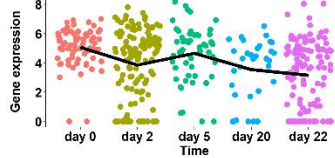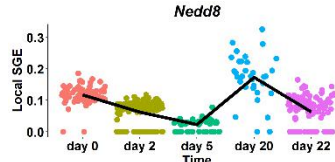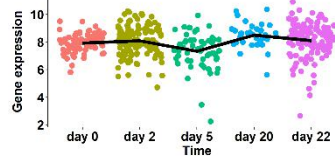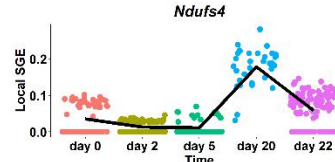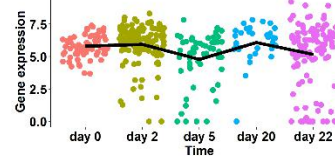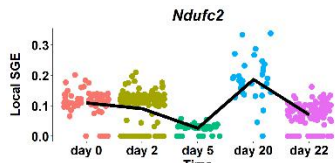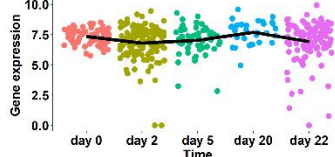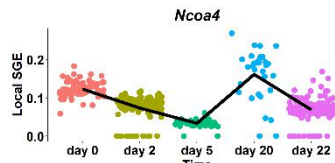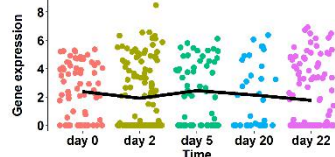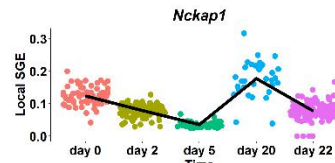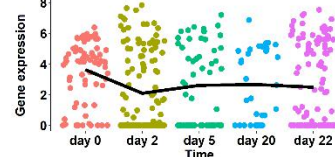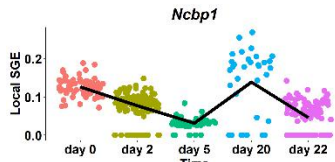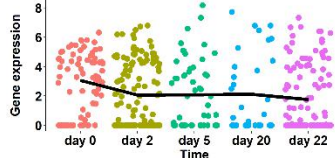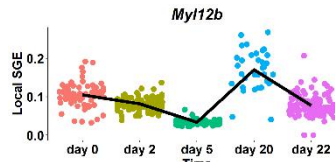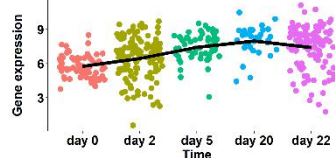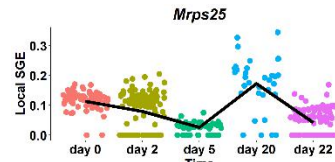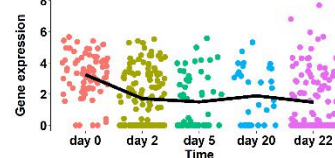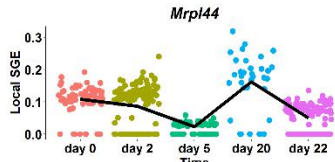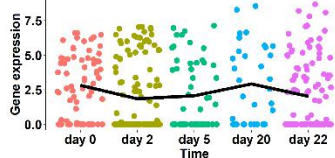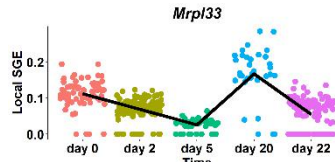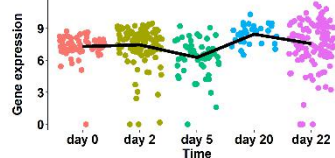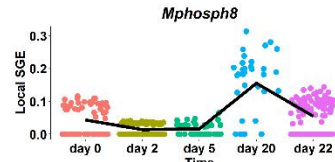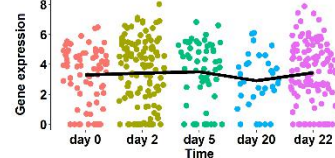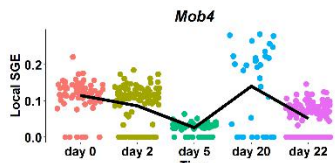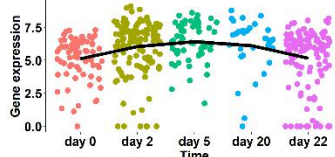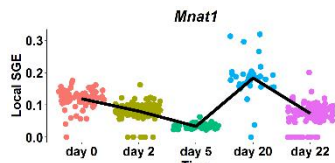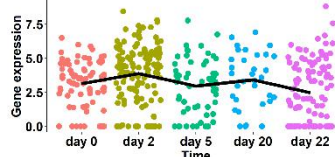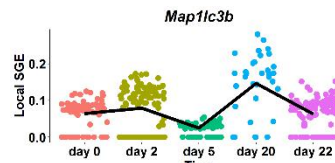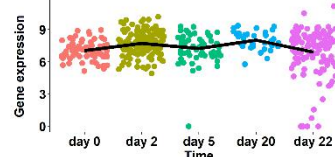

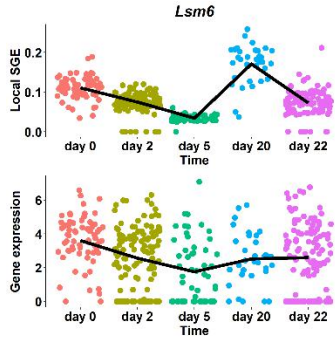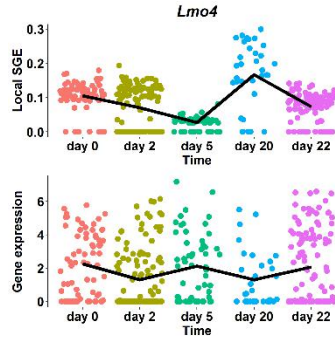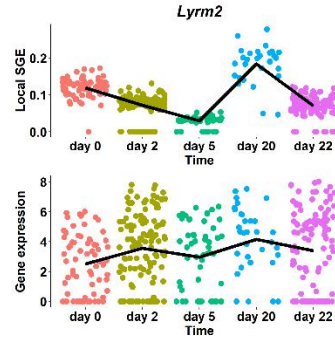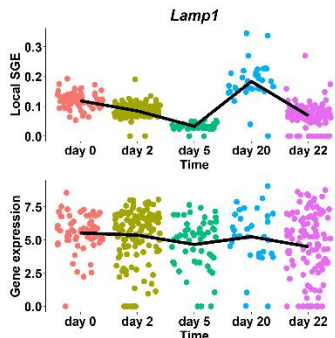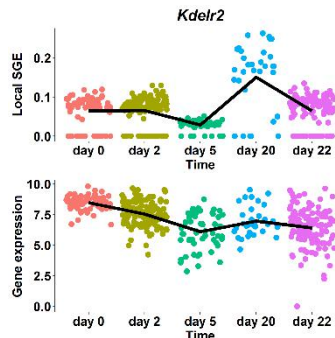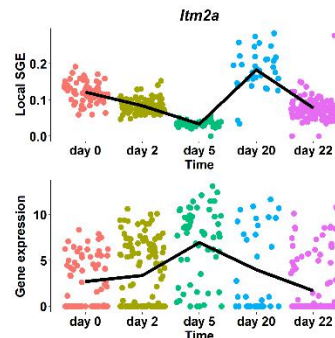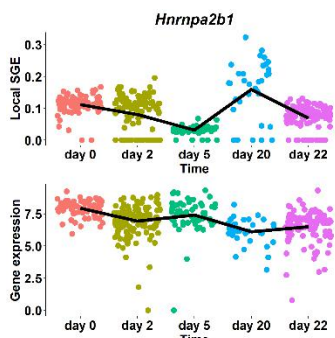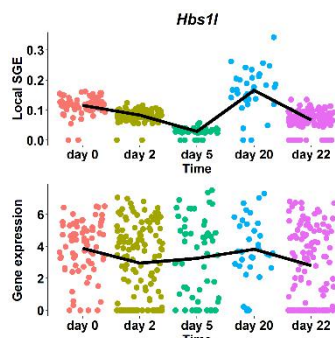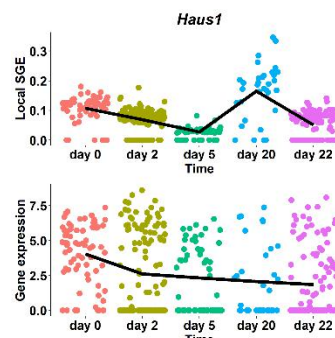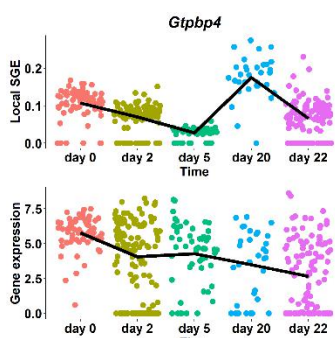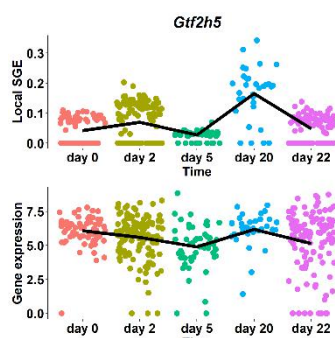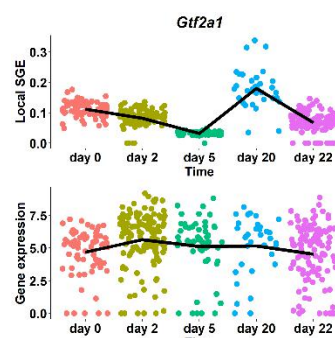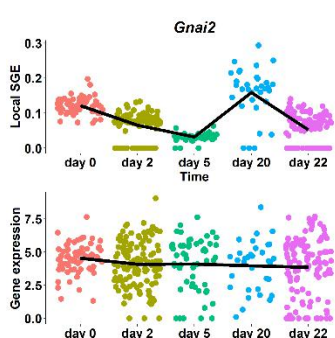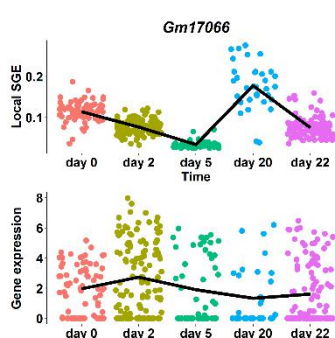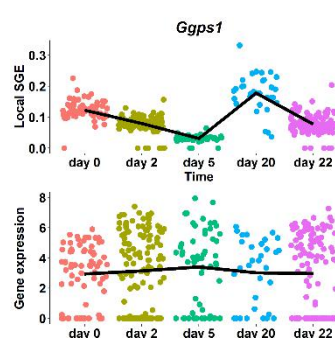

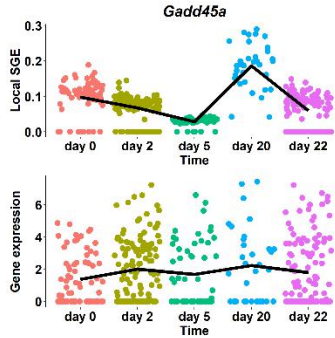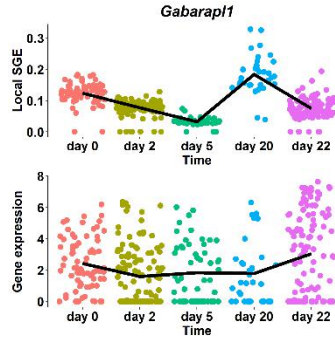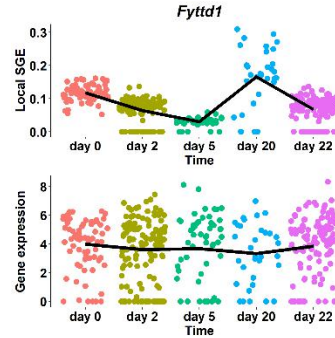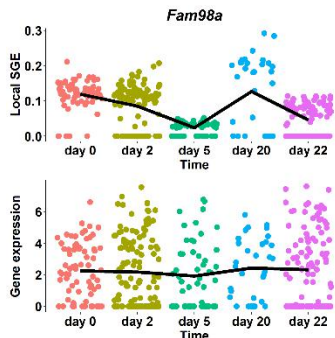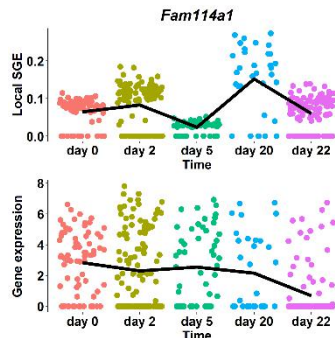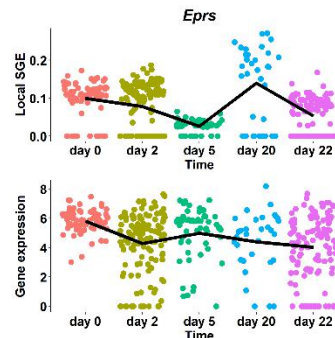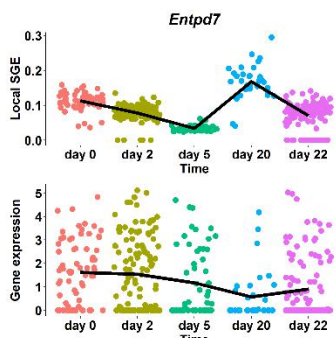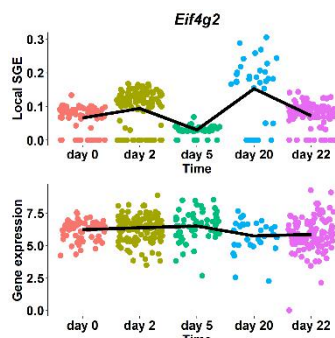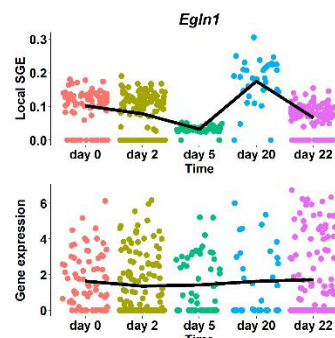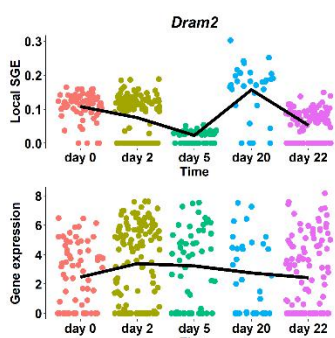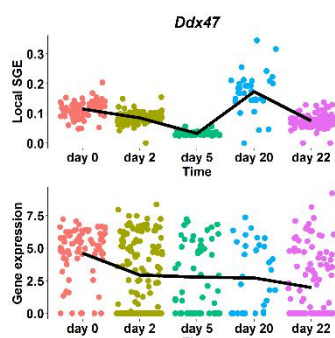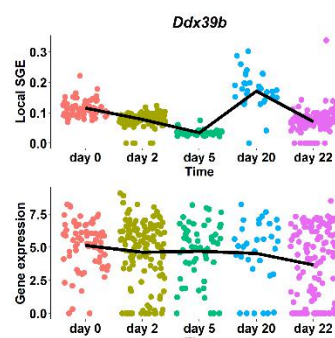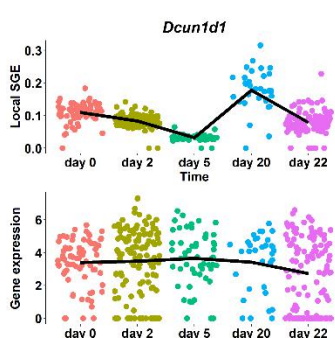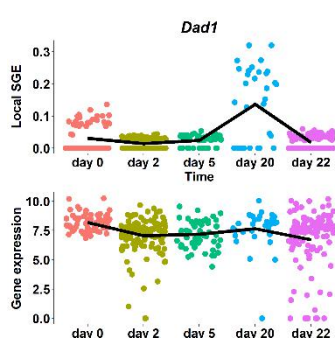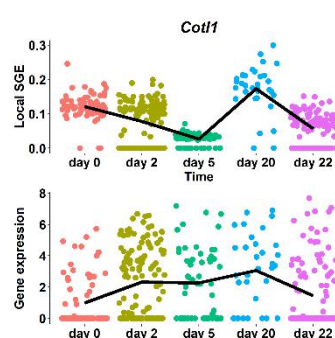

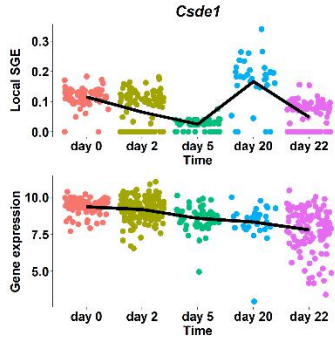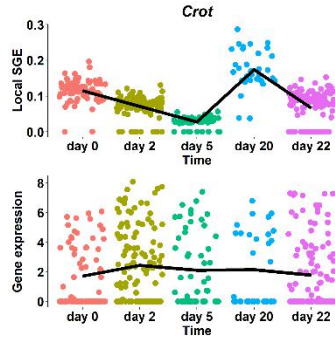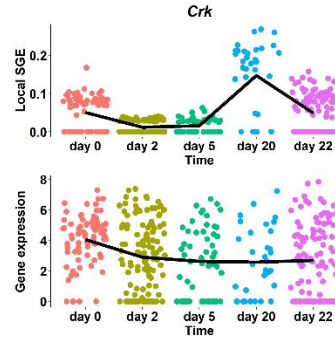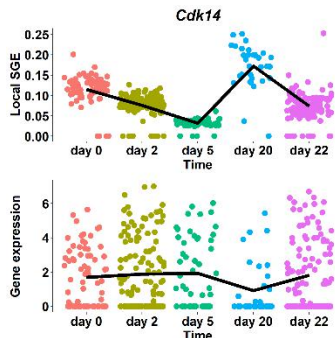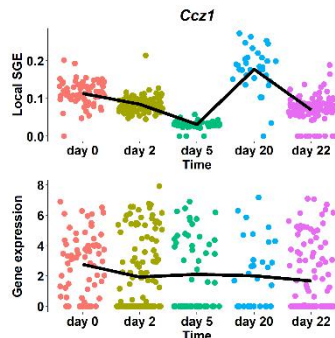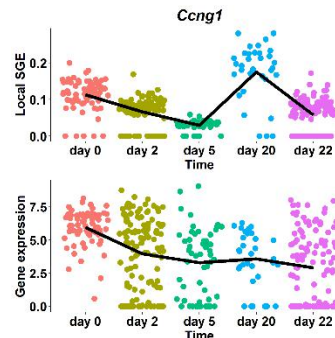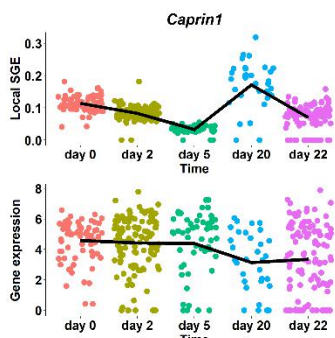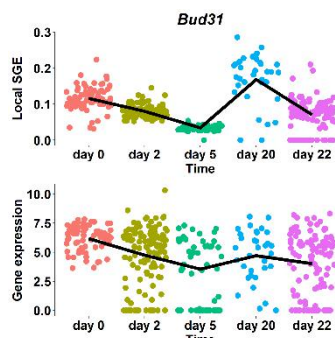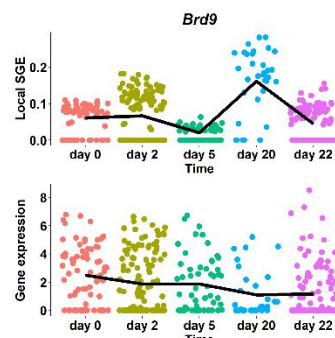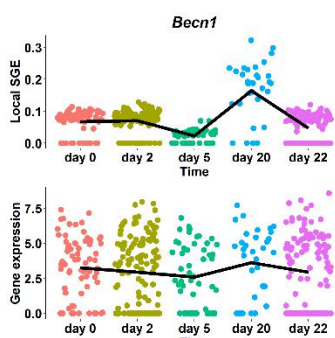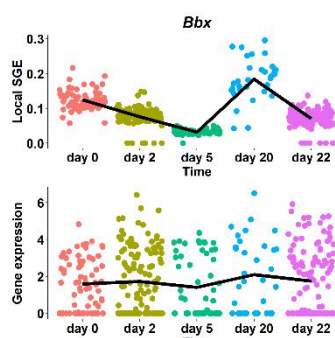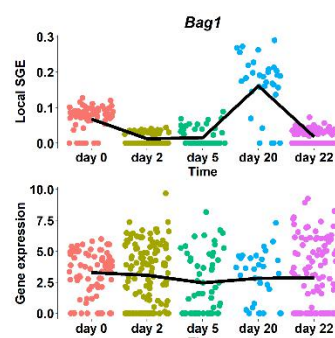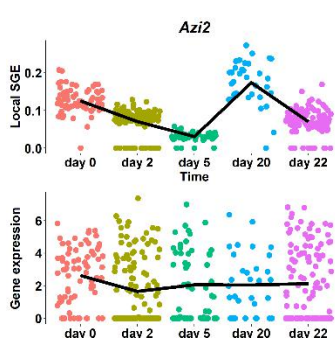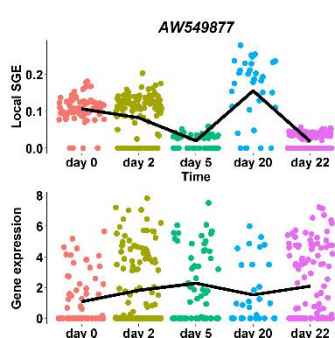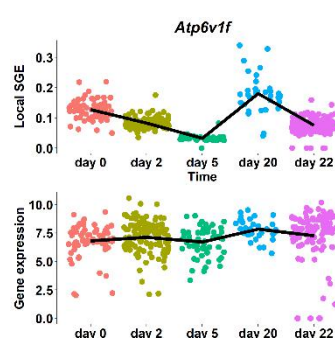

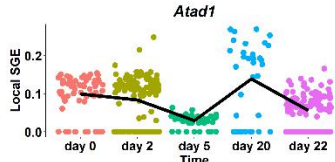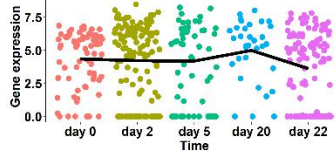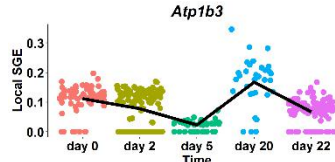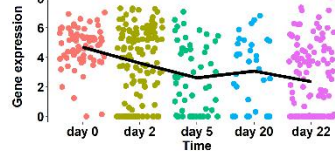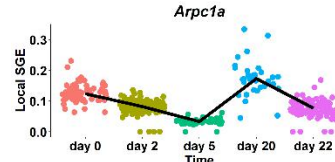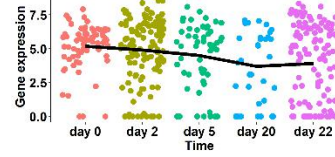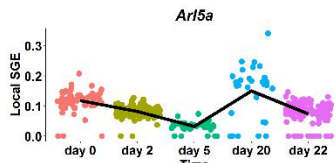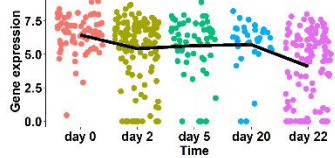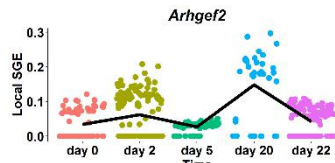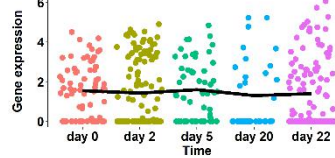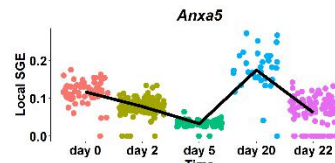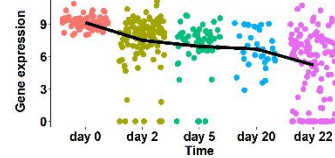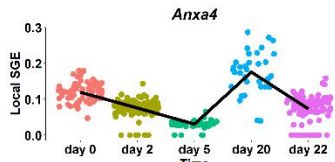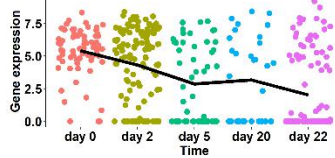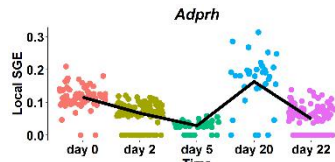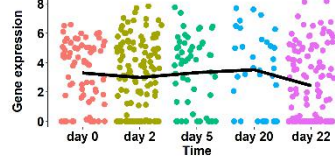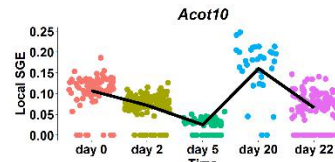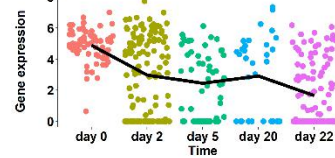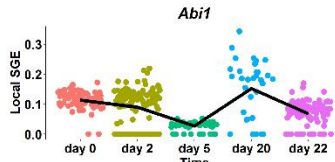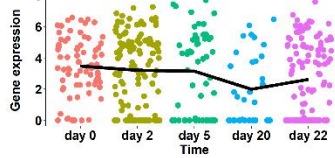

Supplement: mmc11.pdf [file mmc11.pdf]
