# Supplementary material for: scGET: Predicting Cell Fate Transition During Early Embryonic Development by Single-cell Graph Entropy
Source: PubMed Central journal article supplement (PMC8864248; doi:10.1016/j.gpb.2020.11.008), 2021-12-24

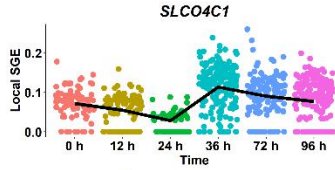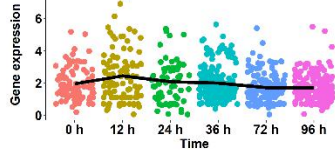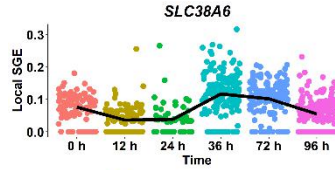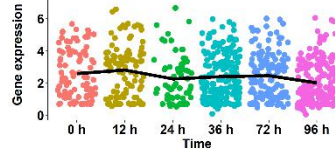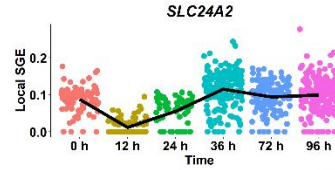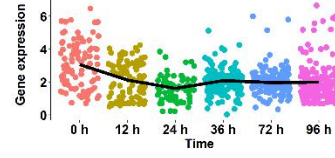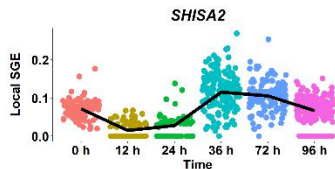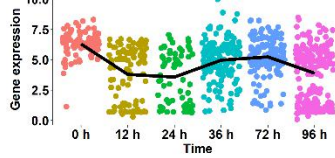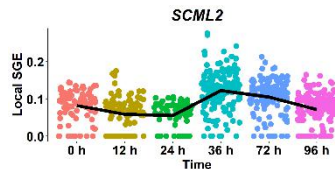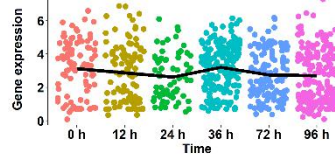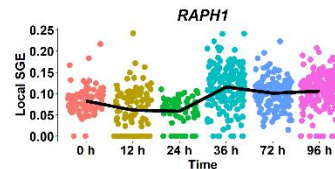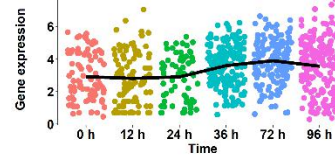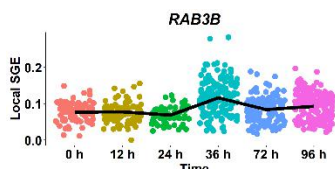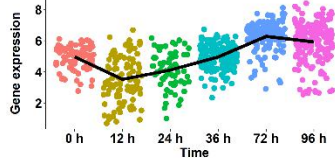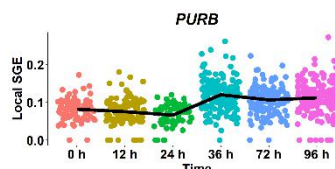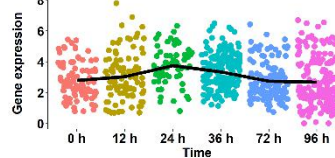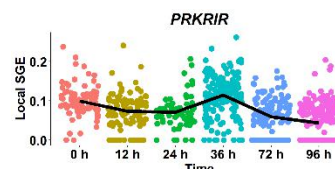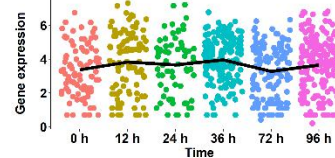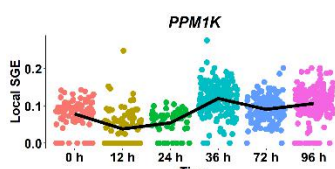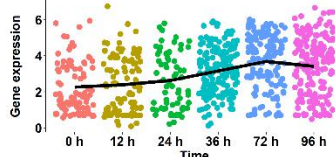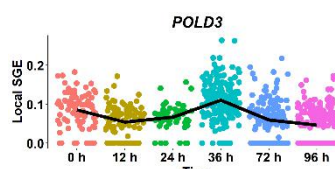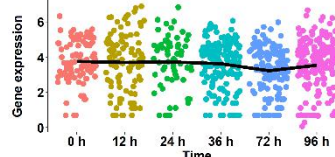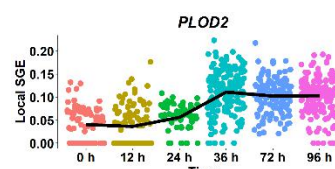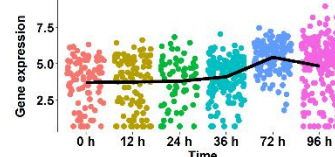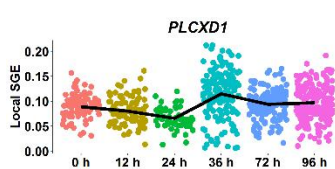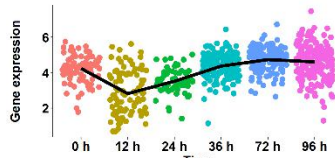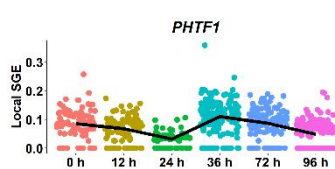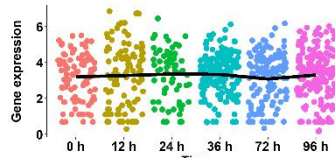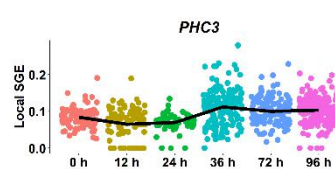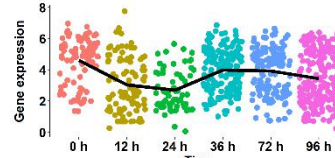

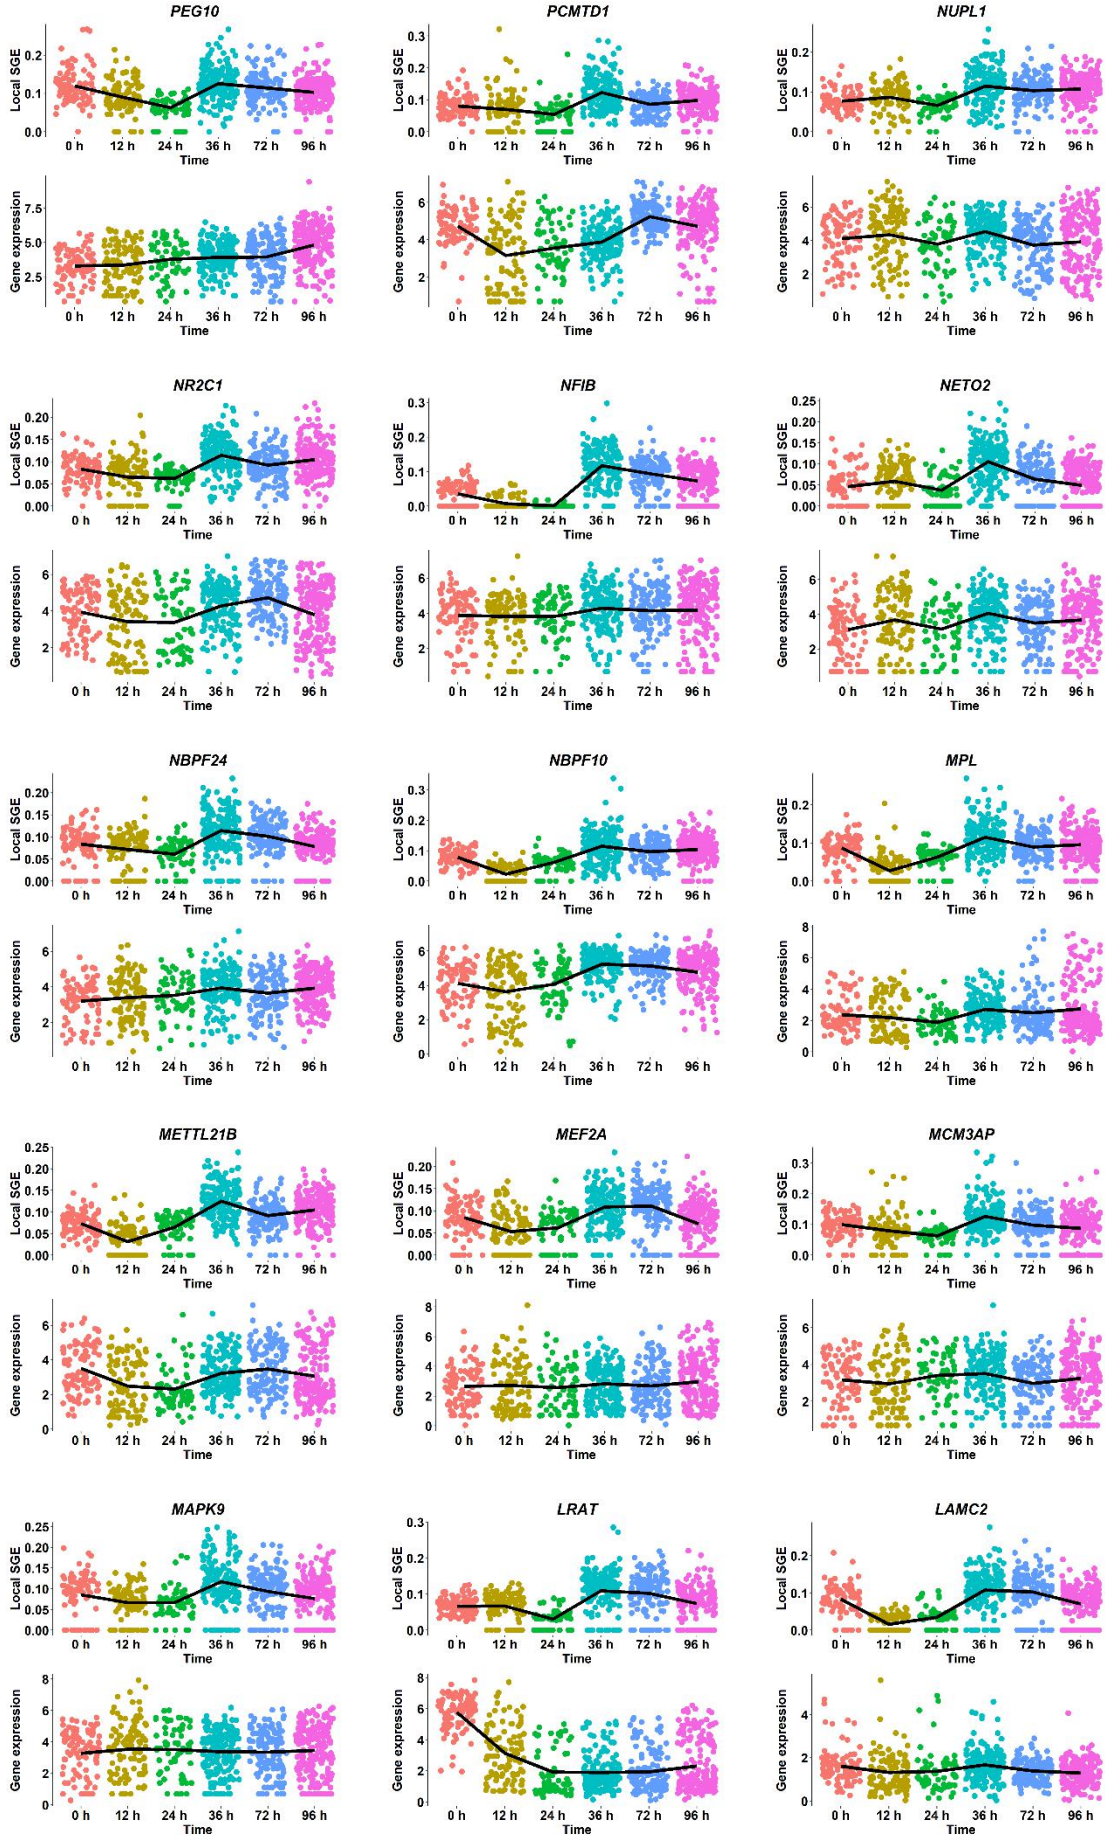



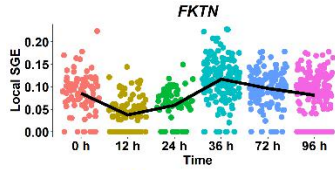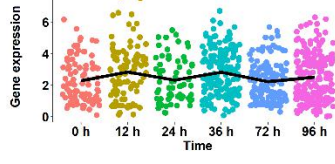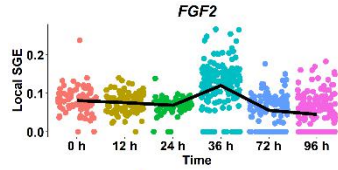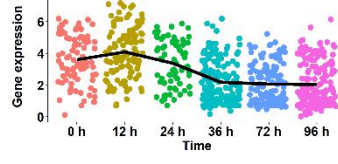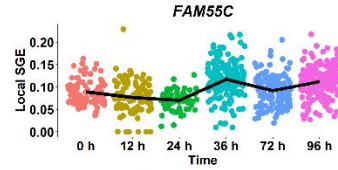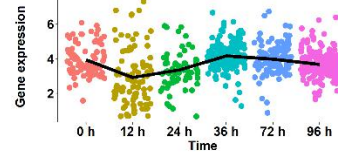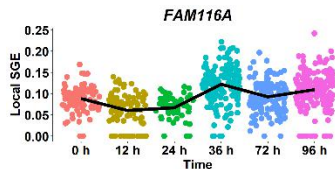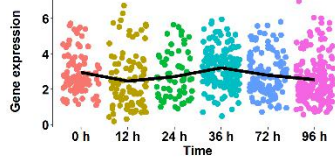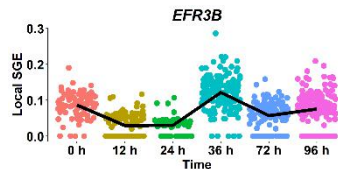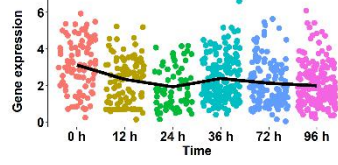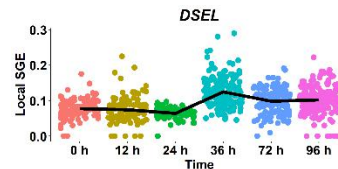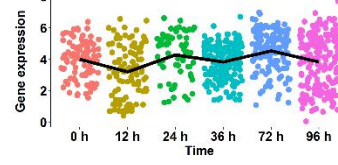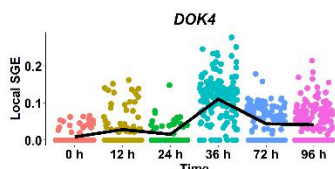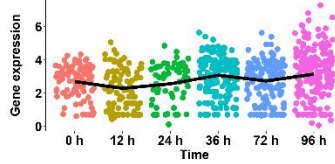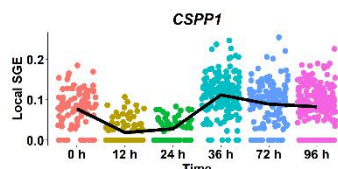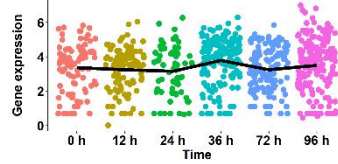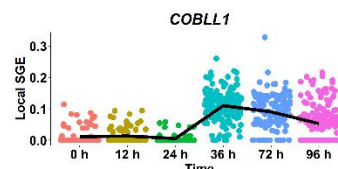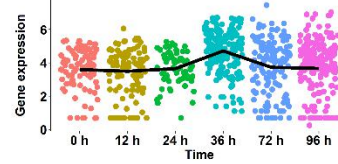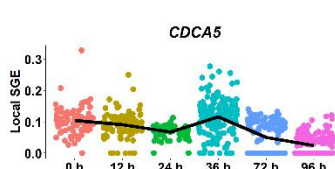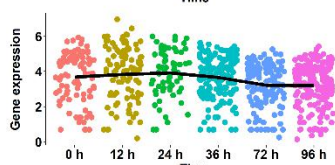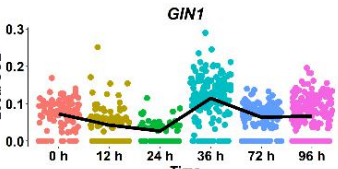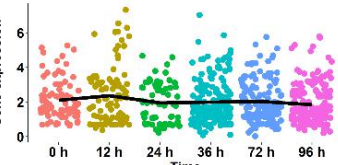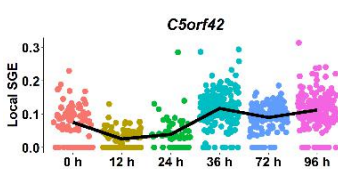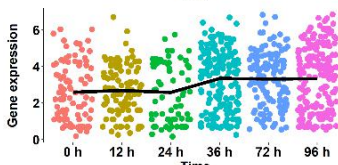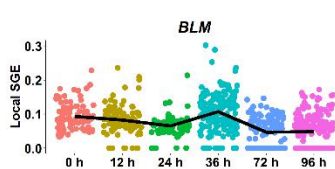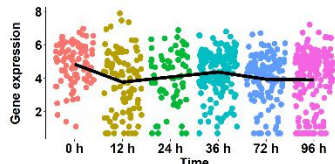

Supplement: mmc13.pdf [file mmc13.pdf]
