# Supplementary material for: scGET: Predicting Cell Fate Transition During Early Embryonic Development by Single-cell Graph Entropy
Source: PubMed Central journal article supplement (PMC8864248; doi:10.1016/j.gpb.2020.11.008), 2021-12-24

**A****hESC-to-DEC data**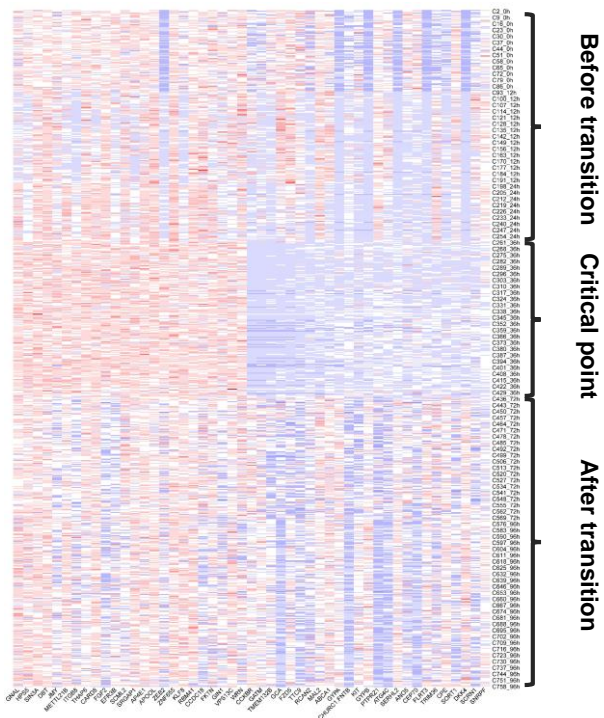**B****MEF-to-neuron data**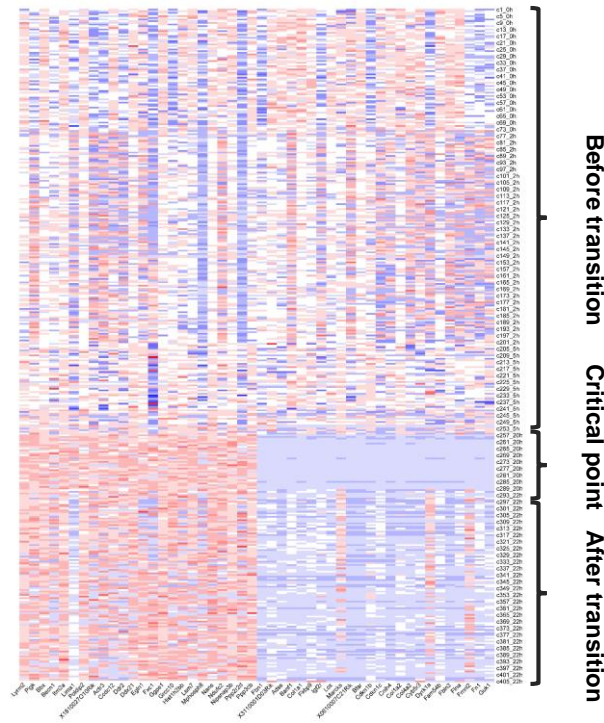**C****mESC-to-MP data**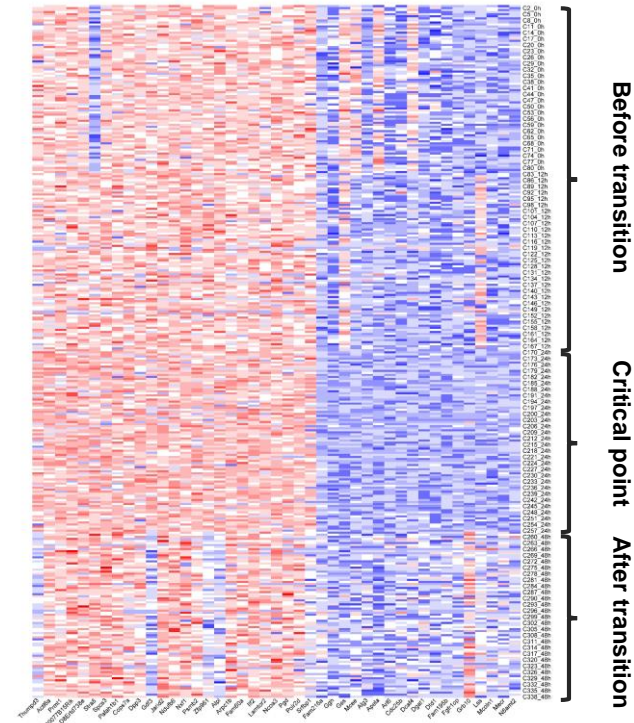**D****MHC-to-HCC data**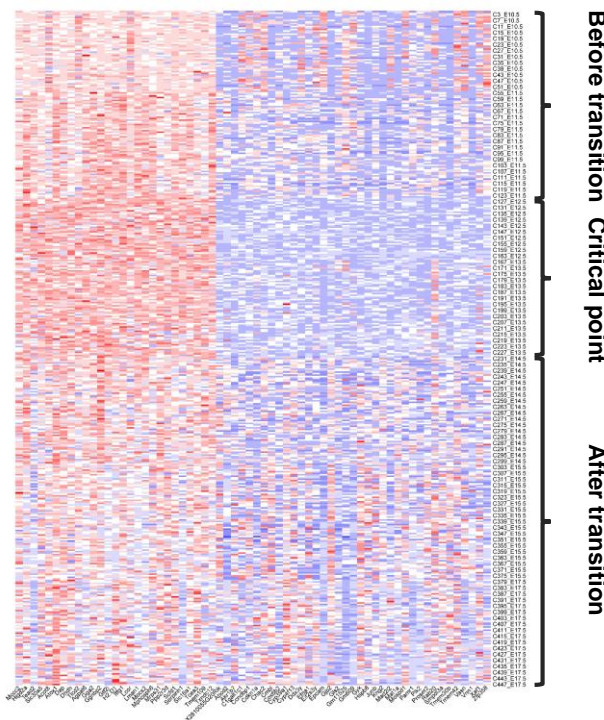**E****NPC-to-neuron data**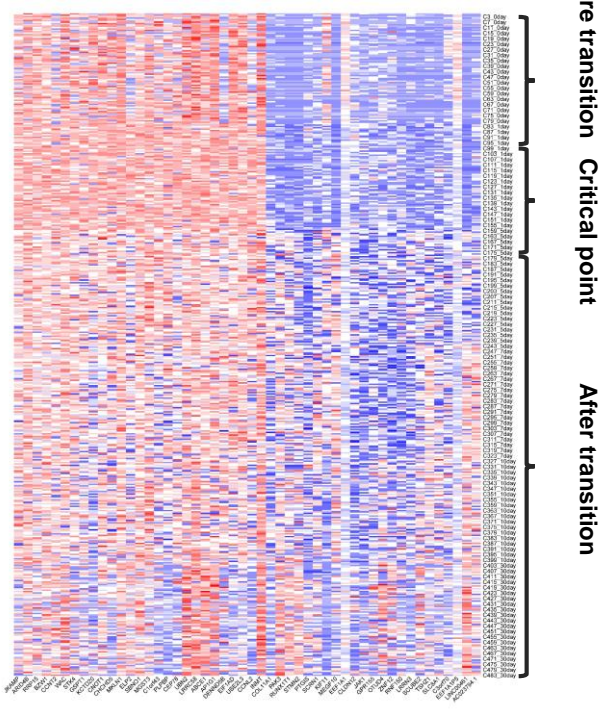

Before transition Critical point After transition

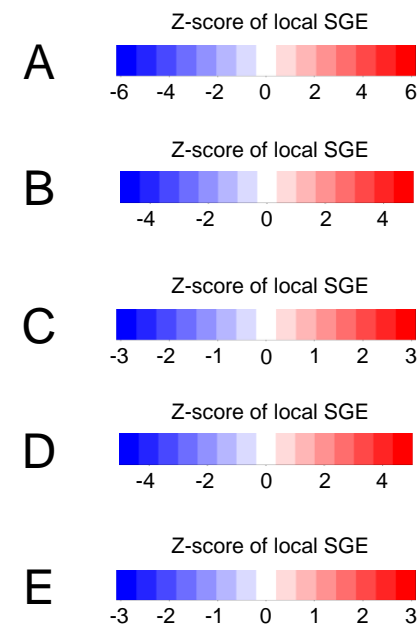

Supplement: mmc5.pdf [file mmc5.pdf]
