# Supplementary material for: scGET: Predicting Cell Fate Transition During Early Embryonic Development by Single-cell Graph Entropy
Source: PubMed Central journal article supplement (PMC8864248; doi:10.1016/j.gpb.2020.11.008), 2021-12-24
Supplement: mmc7.pdf [file mmc7.pdf]

Based on expression of DEGs

Based on local SGE of selected genes\*

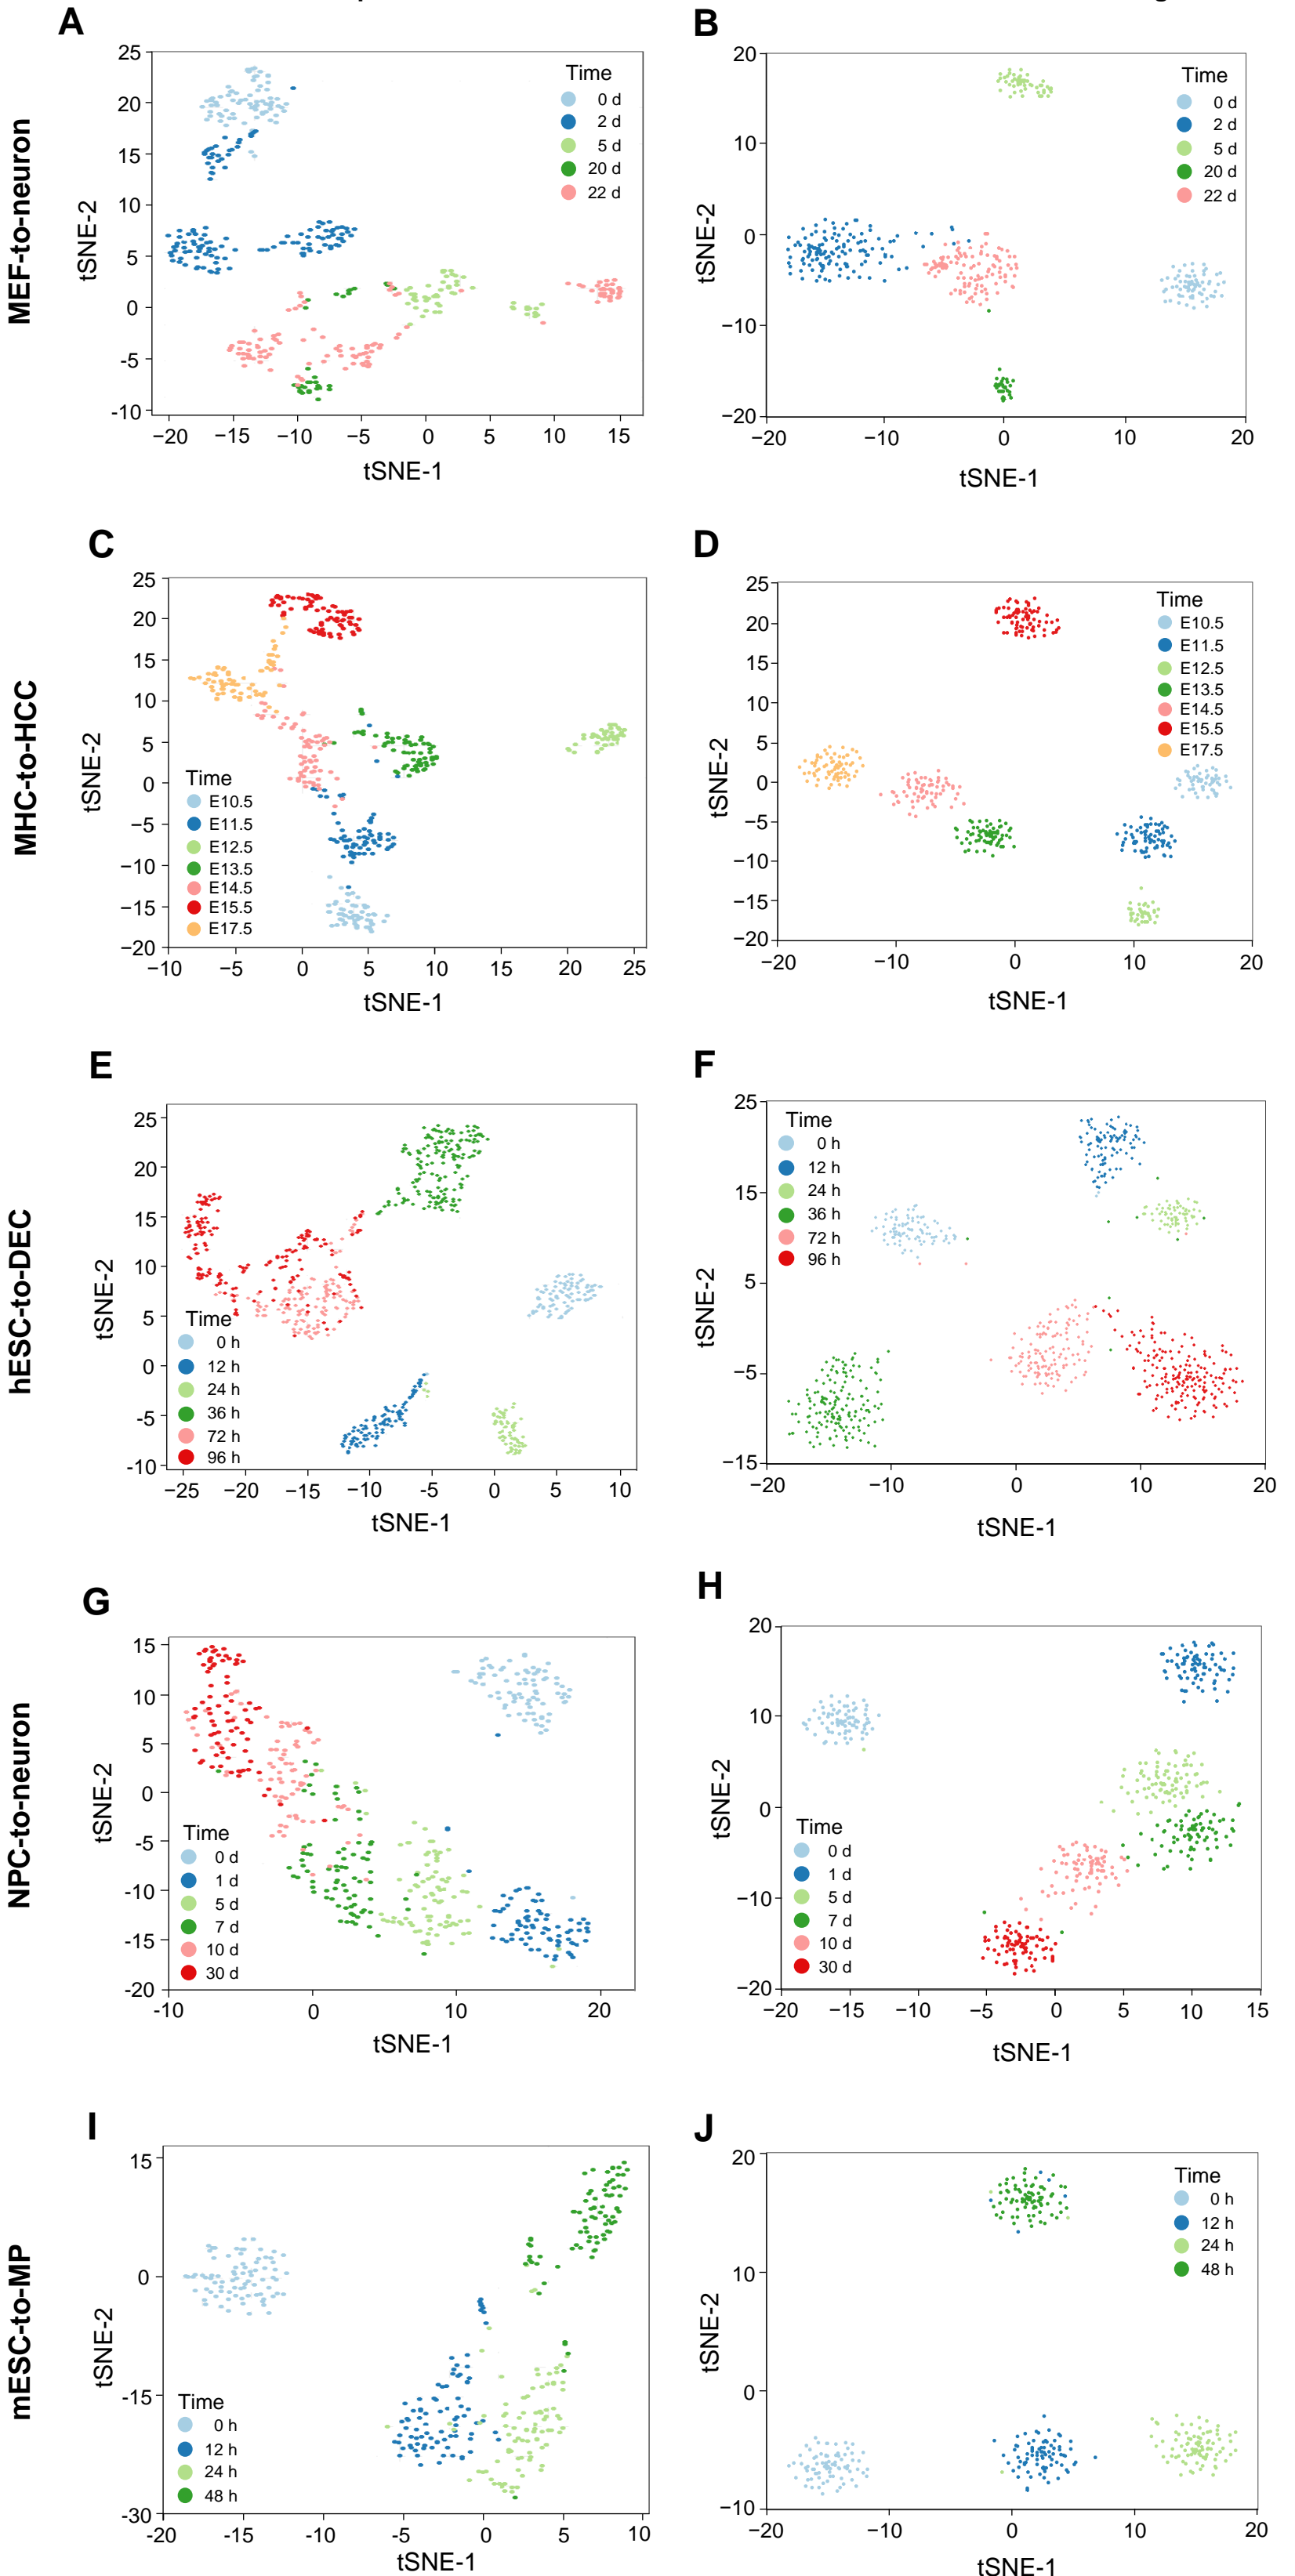

\* The selected genes: the genes with top 5% highest and 5% lowest local SGE values
