# Supplementary material for: scGET: Predicting Cell Fate Transition During Early Embryonic Development by Single-cell Graph Entropy
Source: PubMed Central journal article supplement (PMC8864248; doi:10.1016/j.gpb.2020.11.008), 2021-12-24
Supplement: mmc8.pdf [file mmc8.pdf]

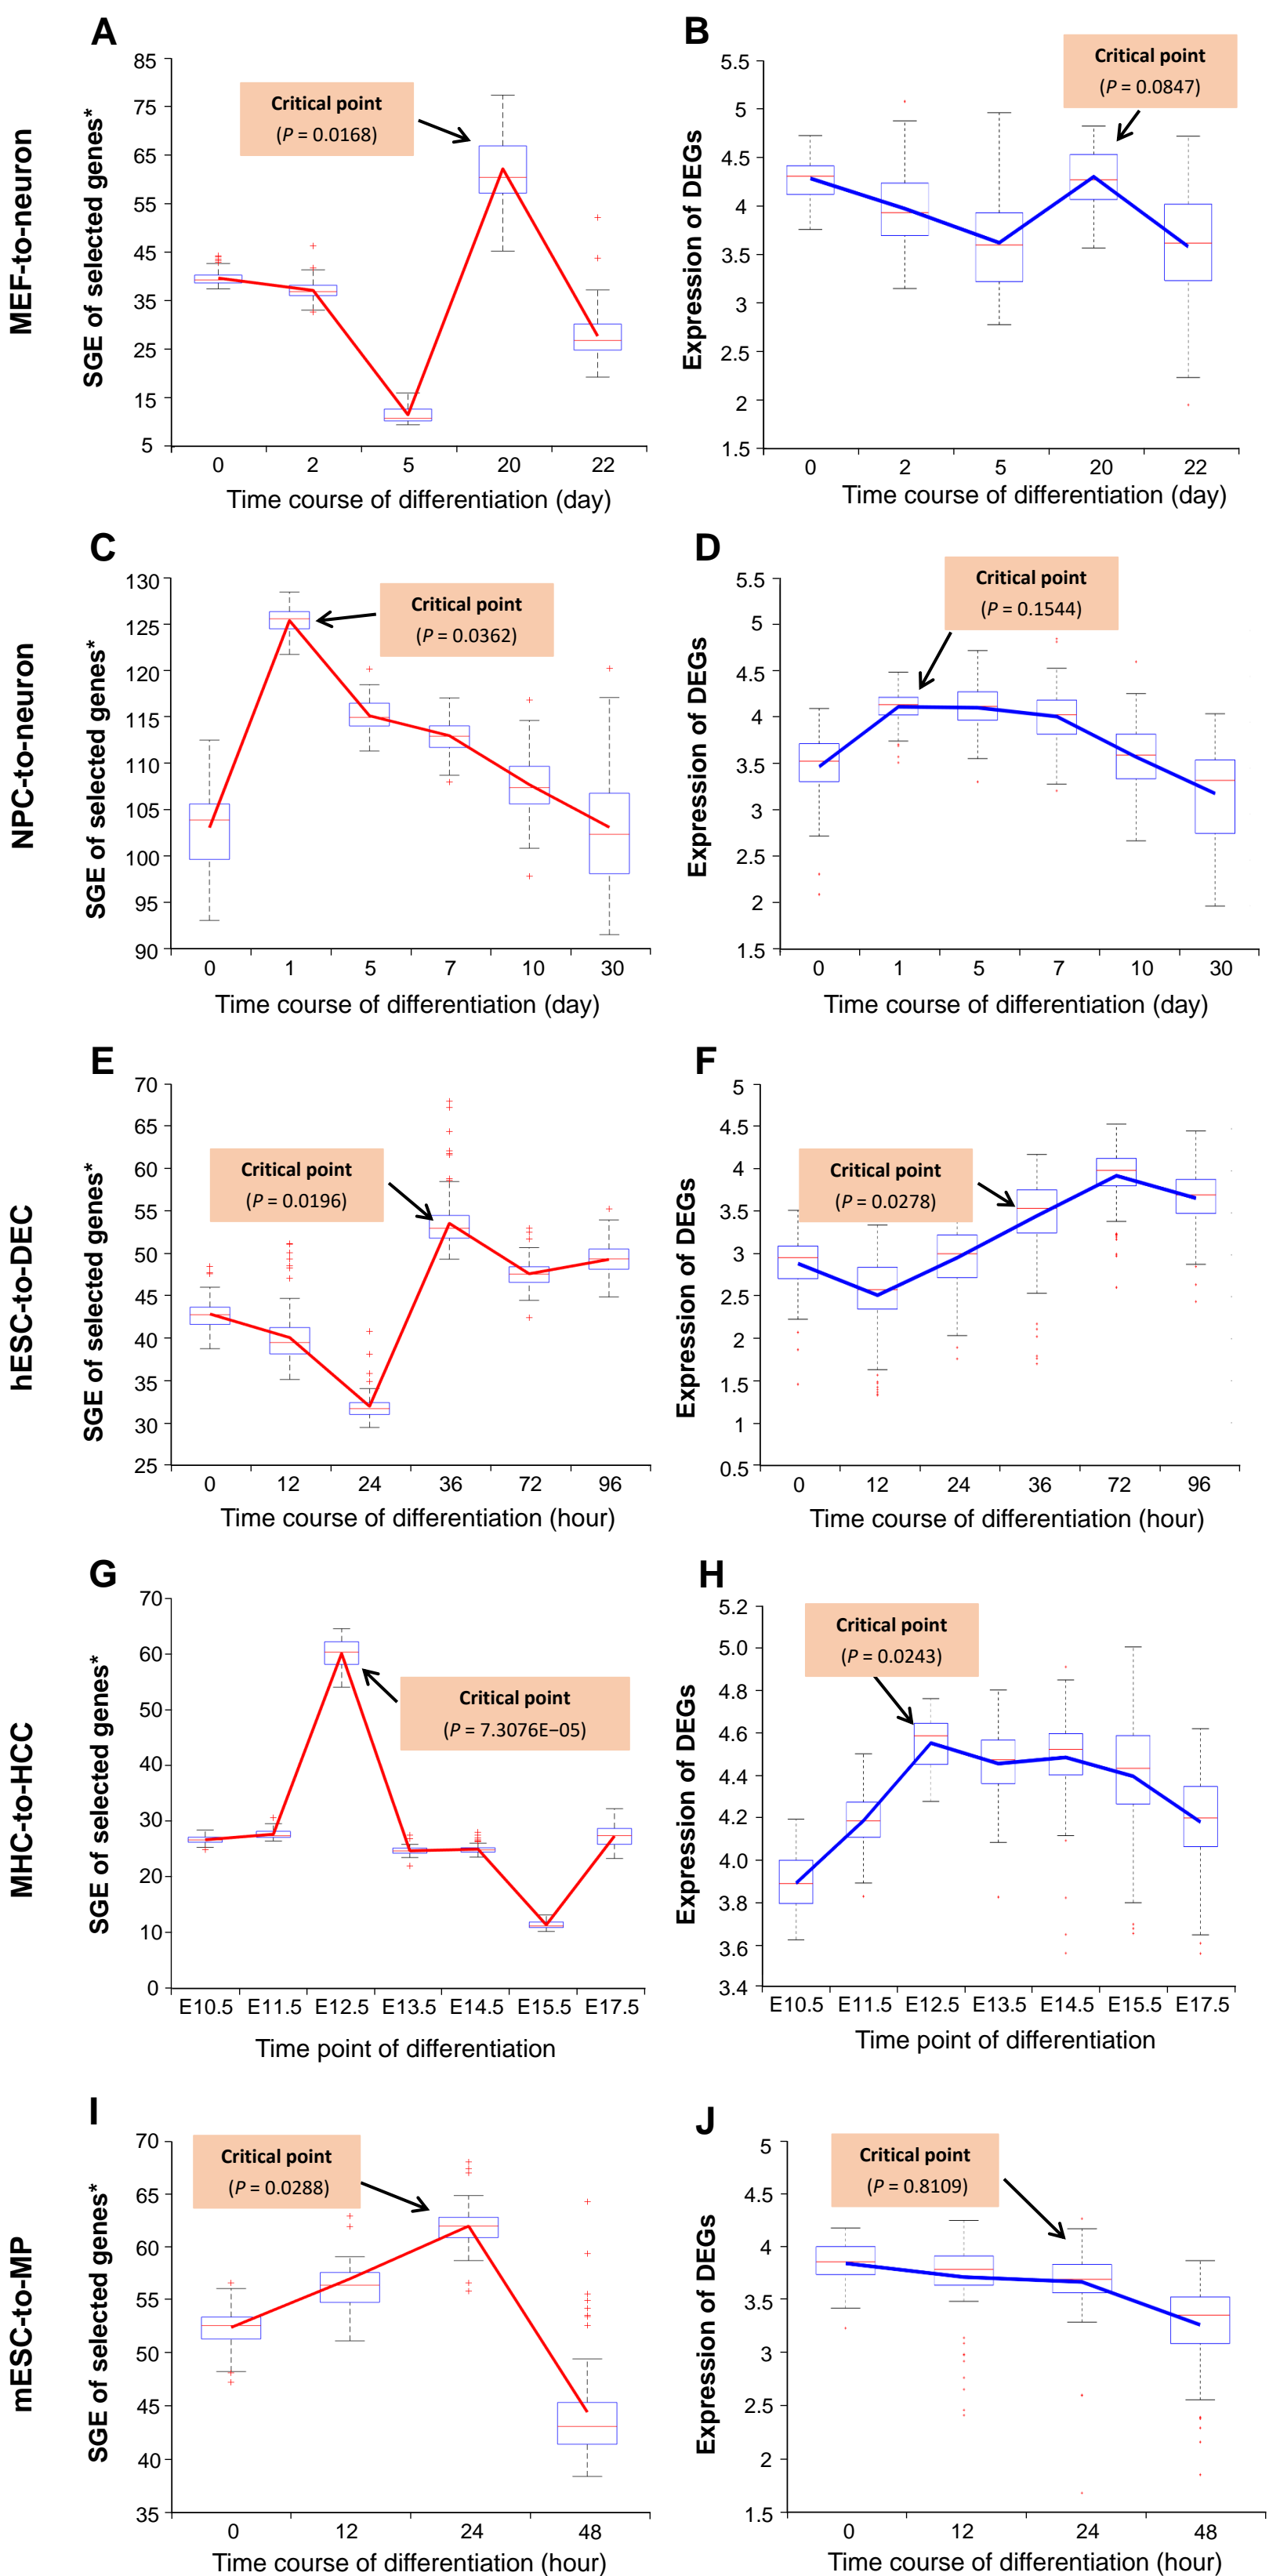

\* The selected genes: the genes with top 5% highest local SGE values
