# Supplementary material for: scGET: Predicting Cell Fate Transition During Early Embryonic Development by Single-cell Graph Entropy
Source: PubMed Central journal article supplement (PMC8864248; doi:10.1016/j.gpb.2020.11.008), 2021-12-24

### A Network change of MHC-to-HCC

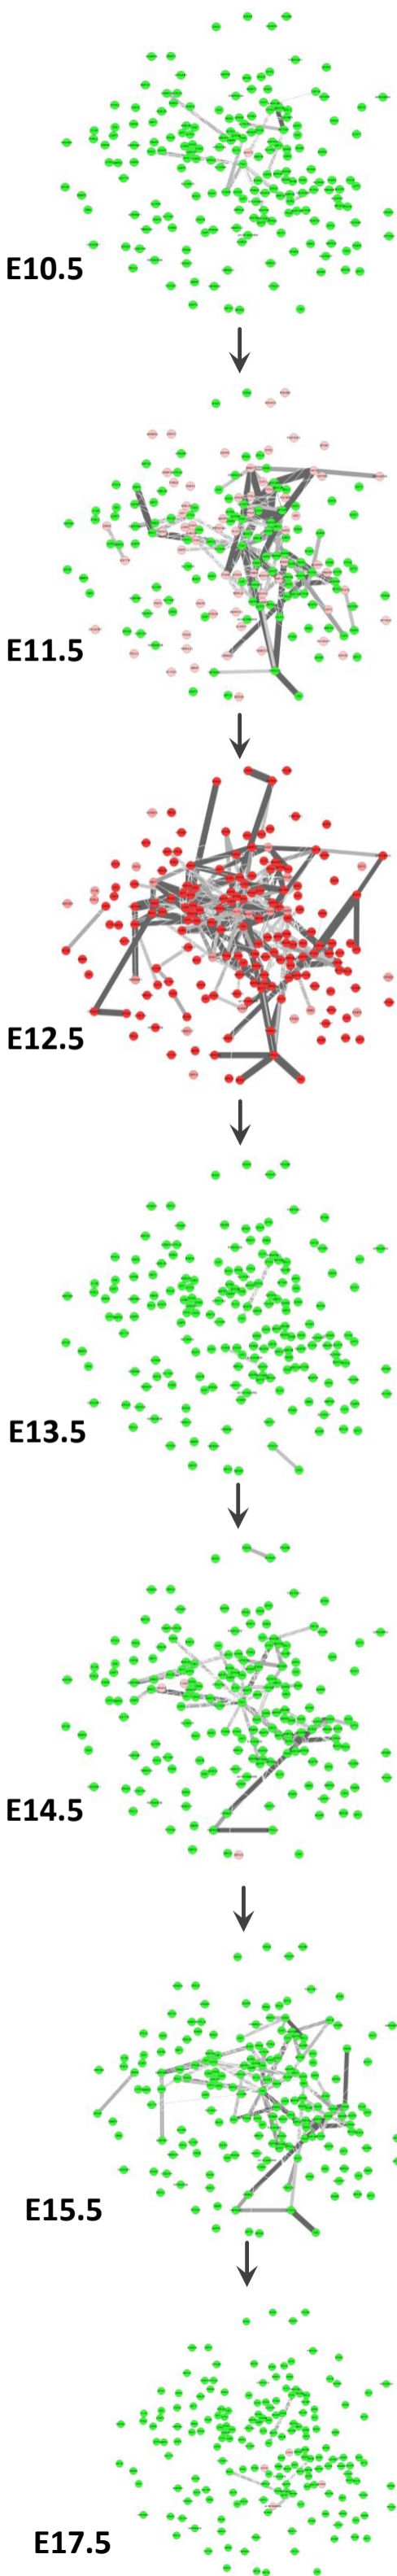

### B Network change of hESC-to-DEC

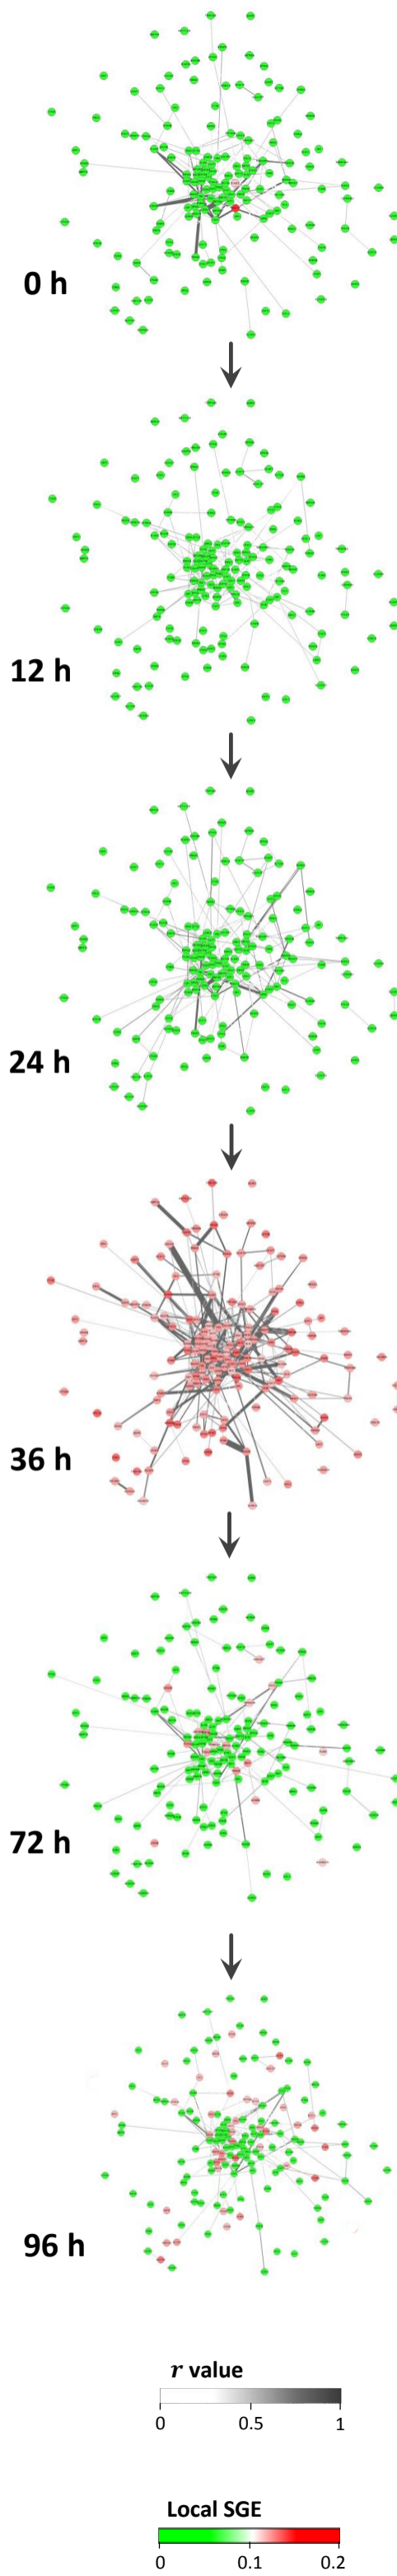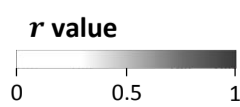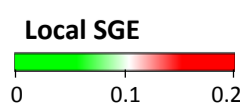

Supplement: mmc9.pdf [file mmc9.pdf]
