# Supplementary material for: scGET: Predicting Cell Fate Transition During Early Embryonic Development by Single-cell Graph Entropy
Source: PubMed Central journal article supplement (PMC8864248; doi:10.1016/j.gpb.2020.11.008), 2021-12-24
Supplement: mmc10.pdf [file mmc10.pdf]

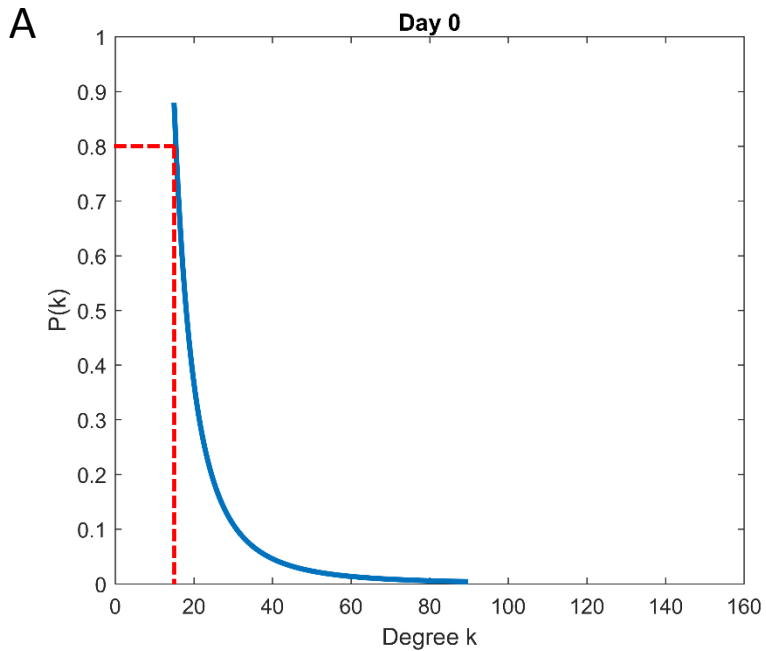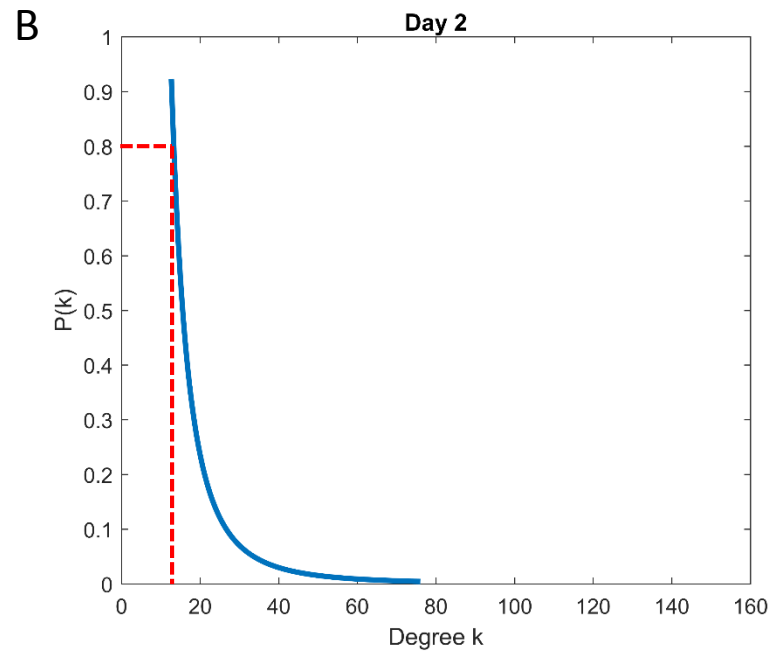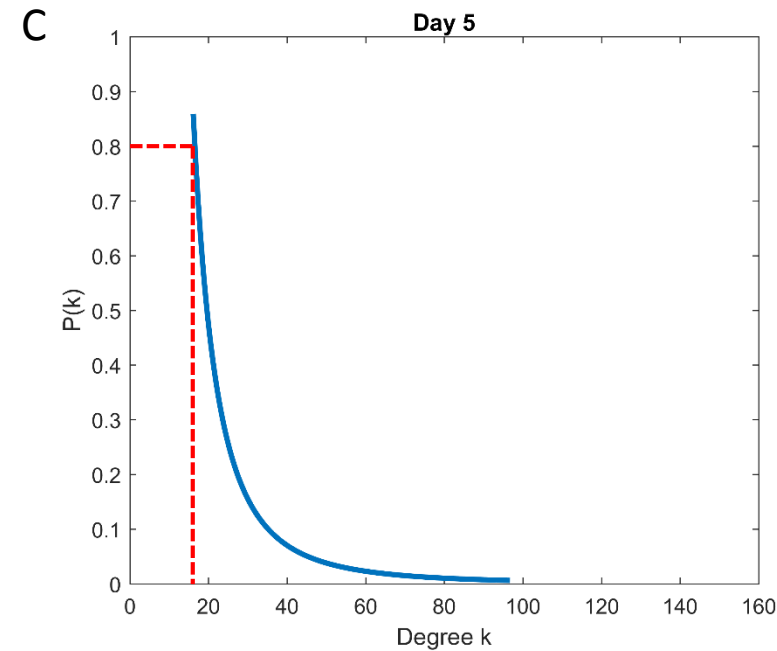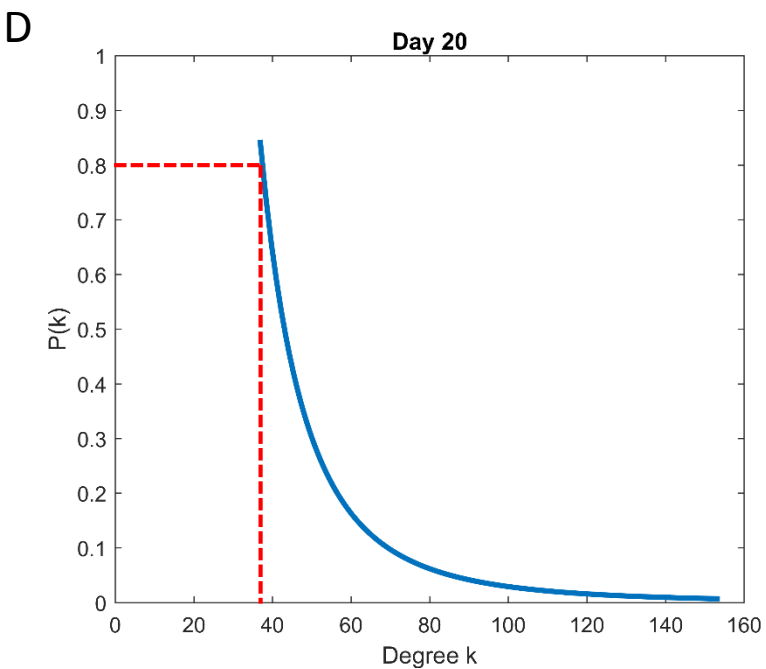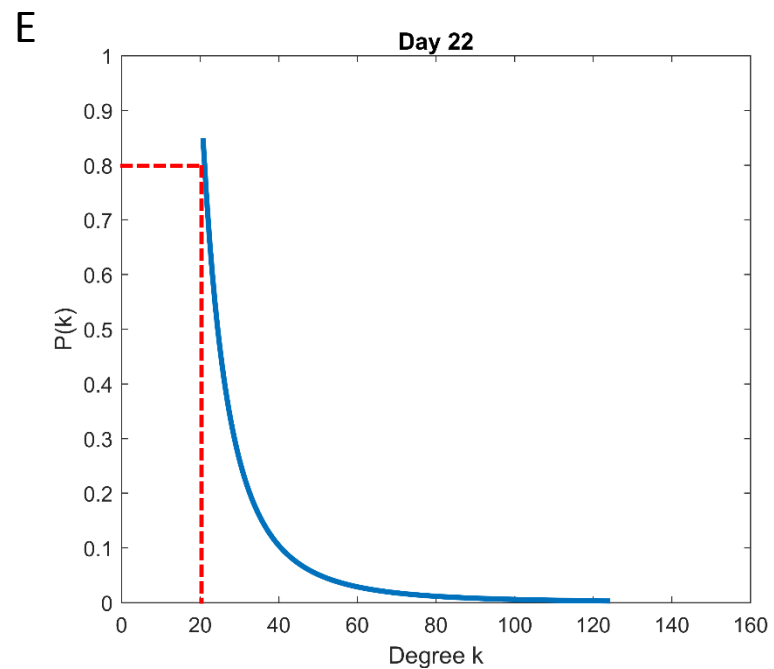

| Time   | Average exponent $\gamma$ |
|--------|---------------------------|
| Day 0  | 3.0041                    |
| Day 2  | 2.9858                    |
| Day 5  | 2.7525                    |
| Day 20 | 3.3735                    |
| Day 22 | 3.1879                    |
