# Supplementary material for: scGET: Predicting Cell Fate Transition During Early Embryonic Development by Single-cell Graph Entropy
Source: PubMed Central journal article supplement (PMC8864248; doi:10.1016/j.gpb.2020.11.008), 2021-12-24
Supplement: mmc16.pdf [file mmc16.pdf]

**A The overlap of signaling genes of human datasets**

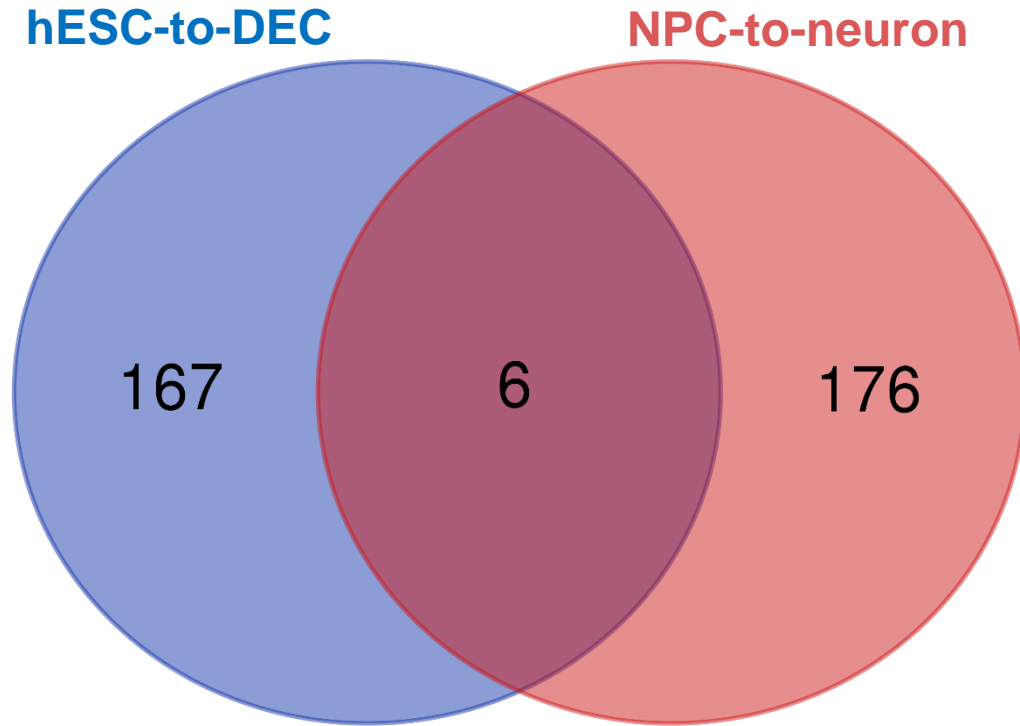

**The 6 common signaling genes:** *HLTF*, *LCOR*, *MGA*, *RAB3B*, *KCTD20*, *PHTF1*

**B The overlap of signaling genes of mouse datasets**

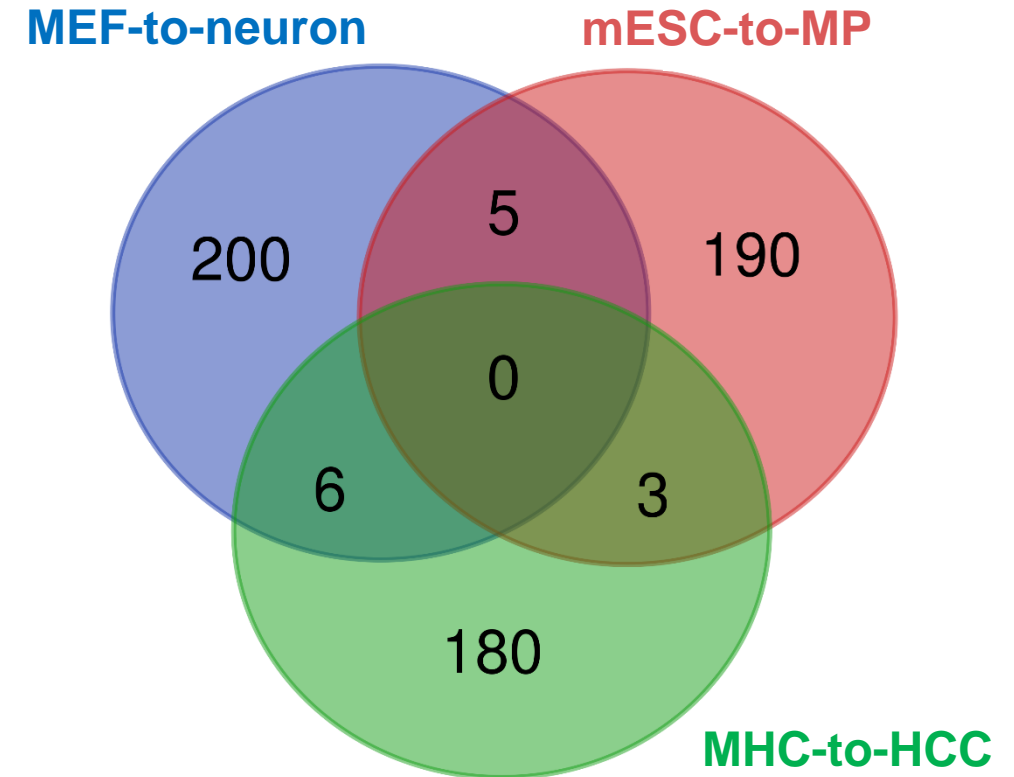

**The 14 common signaling genes:** *Wtap*, *Dpp3*, *2410015M20Rik*, *Gtpbp4*, *Bud31*, *Pdcd5*, *Polr2d*, *Cttn*, *Azi2*, *Bag1*, *Phldb2*, *H2-D1*, *Atp6v1b2*, *Kdelr2*
